# Supplementary material
Source: Springer Nature journal article supplement (https://www.springermedizin.de/resource/supplementary/12913_2012_2456_MOESM1_ESM.pdf/9530530)
Supplement: MOESM1 [file 9530530]

**FAMILY SUPPORT**

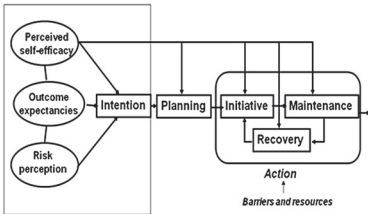

Disengagement

Quantitative Results<sup>2</sup>  
Clinical Outcomes (changes from baseline to 12 months)

- Plasma glucose concentrations improved by 8.6%
- Total cholesterol decreased by 5.1%
- LDL (Low-density lipoprotein) cholesterol decreased by 7.3%
- HDL (High-density lipoprotein) cholesterol increased by 4.4%
- Triglycerides decreased by 7.6%
- Waist circumference decreased by 4.0%
- Weight decreased by 2.7%
- Diastolic blood pressure decreased by 2.6%

**Motivation**

**Volition Phase**

Qualitative Results

- Motivation Phase
- Assessment of personal risk through the FINDRISC score
  - Family history of Type 2 Diabetes
  - Facilitator encouragement

- Volition Phase
- Receiving pathology results
  - Learning and employing new skills such as food label reading and portion control using the 'plate model'.
  - Anticipate barriers such as lack of family support
  - Ability to self monitor through use of food diaries
  - Planning for physical activity such as group walks or attending exercise classes

**LOCAL COMMUNITY SUPPORT**
